# Supplementary material for: Screening organic chemicals in commerce for emissions in the context of environmental and human exposure
Source: Royal Society of Chemistry journal article supplement (doi:10.1039/c2em30259d), 2012-01-01
Supplement: c2em30259d.pdf [file c2em30259d.pdf]

1 **Supporting Information**

2 for

3 **Screening organic chemicals in commerce for emissions in the**  
4 **context of environmental and human exposure**

5

6 Knut Breivik<sup>1,2</sup>, Jon A. Arnot<sup>3</sup>, Trevor N. Brown<sup>3,4</sup>, Michael S. McLachlan<sup>5</sup>, Frank Wania<sup>3</sup>

7 <sup>1</sup> Norwegian Institute for Air Research (NILU), Kjeller, Norway <sup>2</sup> Department of Chemistry, University of  
8 Oslo, Norway, <sup>3</sup> Department of Physical and Environmental Sciences, University of Toronto Scarborough,  
9 Canada, <sup>4</sup> Department of Analytical Environmental Chemistry, Helmholtz Centre for Environmental  
10 Research - UFZ, Permoserstraße 15, 04318 Leipzig, Germany, <sup>5</sup> Department of Applied Environmental  
11 Science (ITM), Stockholm University, Sweden

12

13 **Contents**

14 Methods (continued) ..... 2  
15 Estimating total quantities in commerce from the HPV lists..... 2  
16 Table S1. Industrial Categories discriminated in the EU TGD (ECB, 2003)..... 3  
17 Table S2. Use Categories discriminated in the EU TGD (ECB, 2003)..... 3  
18 Table S3. Frequency distribution for valid IC/UC categories among European HPV substances (in %). ..... 5  
19 References (SI) ..... 6

20

21

22

23

24

25

26

27

28

## 29 **Methods (continued)**

### 30 **Estimating total quantities in commerce from the HPV lists**

31 We initially calculated the sum of  $B_{MAX}$  and  $B_{MIN}$  for chemicals which appeared on the US, Japanese  
32 and/or highly resolved European lists only ( $\Sigma_3 B_{MIN}$ ,  $\Sigma_3 B_{MAX}$ ), furthermore excluding substances which  
33 were included into the top bin on any of these lists (those without upper brackets defined). The  
34 resulting ranges across these lists ( $\Sigma_3 B_{MAX} - \Sigma_3 B_{MIN}$ ) for any chemical considered were always 2.02 log  
35 units or less (N=10,236). As a first approximation, we assumed that any missing brackets would be  
36 anticipated to be no more than about 2 orders of magnitude higher (or lower) than  $B_{MIN}$  (or  $B_{MAX}$ ) for the  
37 corresponding bin. This “empirical” range was in turn derived to estimate  $B_{MAX}$  for the upper bins as well  
38 as  $B_{MIN}$  on the US list. As the pre-defined range for the lower bin on the Canadian list ( $1-10^3$  t/yr)  
39 exceeded the empirical range derived above, the same range (2.02 log units) was also applied in this  
40 specific case to derive a revised estimate for  $B_{MAX}$  for this bin whenever (i) a given chemical was included  
41 into this bin on the Canadian list only (which would indicate that the chemical was more likely to belong  
42 into the lower end of this bin), or (ii) the sum of  $B_{MAX}$  for the European, US and Japanese lists constituted  
43 less than 10 t/yr (i.e. < 1% of the pre-defined  $B_{MAX}$  value of 1000 t/yr on the Canadian list). This  
44 correction was made to reduce the risk of significantly overestimating  $B_{MAX}$  for chemicals belonging to  
45 the Canadian bin under circumstances when quantities were relatively minor on the other lists. The sum  
46 of the resulting upper and lower brackets from the US, European, Japanese and Canadian lists ( $\Sigma_4 B_{MIN}$ ,  
47  $\Sigma_4 B_{MAX}$ ) were then derived for all substances and compared with the OECD data. If the substance also  
48 appeared on the OECD list ( $>10^3$  t/yr) and, (i)  $\Sigma_4 B_{MIN}$  was less than  $10^3$  t/yr, then  $10^3$  t/yr were used as  
49 the minimum quantity ( $Q_{MIN}$ ), (ii) if the estimated upper bracket on the OECD list (i.e.  $10^{5.02}$ ) exceeded  
50  $\Sigma_4 B_{MAX}$ , then the maximum quantity ( $Q_{MAX}$ ) was assumed equal to  $10^{5.02}$ . Otherwise,  $Q_{MIN}$  and  $Q_{MAX}$  were  
51 assumed equal to  $\Sigma_4 B_{MIN}$  and  $\Sigma_4 B_{MAX}$ , respectively.

52

53

54

55

56

57

58

59

60 Table S1. Industrial Categories discriminated in the EU TGD (ECB, 2003).

| IC     | Definition                                         |
|--------|----------------------------------------------------|
| 1      | Agricultural industry                              |
| 2      | Chemical industry: Basic chemicals                 |
| s3     | Chemical industry: Chemicals used in synthesis     |
| 4      | Electrical/electronic industry                     |
| 5      | Personal/domestic                                  |
| 6      | Public domain                                      |
| 7      | Leather processing industry                        |
| 8      | Metal extraction, refining and processing industry |
| 9      | Mineral oil and fuel industry                      |
| 10     | Photographic industry                              |
| 11     | Polymers industry                                  |
| 12     | Pulp, paper and board industry                     |
| 13     | Textile processing industry                        |
| 14     | Paints, lacquers and varnishes industry            |
| 15 (0) | Others                                             |
| 16     | Engineering industry: civil and mechanical         |

61

62 Table S2. Use Categories discriminated in the EU TGD (ECB, 2003).

| UC | Definition                            |
|----|---------------------------------------|
| 1  | Absorbents and adsorbents             |
| 2  | Adhesive, binding agents              |
| 3  | Aerosol propellants                   |
| 4  | Anti-condensation agents              |
| 5  | Anti-freezing agents                  |
| 6  | Anti-set-off and anti-adhesive agents |
| 7  | Anti-static agents                    |
| 8  | Bleaching agents                      |
| 9  | Cleaning/washing agents and additives |
| 10 | Colouring agents                      |
| 11 | Complexing agents                     |
| 12 | Conductive agents                     |
| 13 | Construction materials and additives  |
| 14 | Corrosion inhibitors                  |
| 15 | Cosmetics                             |
| 16 | Dust binding agents                   |
| 17 | Electroplating agents                 |
| 18 | Explosives                            |
| 19 | Fertilisers                           |

63

64

65 Table S2 (cont. from previous page)

| <b>UC</b> | <b>Definition</b>                           |
|-----------|---------------------------------------------|
| 20        | Fillers                                     |
| 21        | Fixing agents                               |
| 22        | Flame retardants and fire preventing agents |
| 23        | Flotation agents                            |
| 24        | Flux agents for casting                     |
| 25        | Foaming agents                              |
| 26        | Food/feedstuff additives                    |
| 27        | Fuels                                       |
| 28        | Fuel additives                              |
| 29        | Heat transferring agents                    |
| 30        | Hydraulic fluids and additives              |
| 31        | Impregnation agents                         |
| 32        | Insulating materials                        |
| 33        | Intermediates                               |
| 34        | Laboratory chemicals                        |
| 35        | Lubricants and additives                    |
| 36        | Odour agents                                |
| 37        | Oxidising agents                            |
| 38        | Plant protection products, agricultural     |
| 39        | Biocides, non-agricultural                  |
| 40        | pH-regulating agents                        |
| 41        | Pharmaceuticals                             |
| 42        | Photochemicals                              |
| 43        | Process regulators                          |
| 44        | Reducing agents                             |
| 45        | Reprographic agents                         |
| 46        | Semiconductors                              |
| 47        | Softeners                                   |
| 48        | Solvents                                    |
| 49        | Stabilisers                                 |
| 50        | Surface-active agents                       |
| 51        | Tanning agents                              |
| 52        | Viscosity adjustors                         |
| 53        | Vulcanising agents                          |
| 54        | Welding and soldering agents                |
| 55 (0)    | Other                                       |

66

67

68

69

70 Table S3. Frequency distribution for valid IC/UC categories among European HPV substances (in  
 71 %).

|    | 1    | 2    | 3    | 4    | 5    | 6    | 7    | 8    | 9    | 10   | 11   | 12   | 13   | 14   | 15   | 16 |
|----|------|------|------|------|------|------|------|------|------|------|------|------|------|------|------|----|
| 1  | 0    | 0.17 | 0.19 | 0    | 0    | 0    | 0    | 0    | 0    | 0    | 0    | 0    | 0    | 0    | 0.18 | 0  |
| 2  | 0    | 0    | 0    | 0.19 | 0.50 | 0.36 | 0    | 0    | 0    | 0    | 0    | 0.50 | 0    | 0    | 0.82 | 0  |
| 3  | 0.04 | 0    | 0    | 0    | 0.27 | 0    | 0    | 0    | 0    | 0    | 0    | 0    | 0    | 0.07 | 0.25 | 0  |
| 4  | 0    | 0.02 | 0.02 | 0    | 0    | 0    | 0    | 0    | 0    | 0    | 0    | 0    | 0    | 0.02 | 0.02 | 0  |
| 5  | 0    | 0.21 | 0.22 | 0    | 0.13 | 0    | 0    | 0    | 0.09 | 0    | 0    | 0    | 0    | 0    | 0.19 | 0  |
| 6  | 0    | 0.06 | 0.04 | 0    | 0.05 | 0.01 | 0.04 | 0    | 0    | 0    | 0.07 | 0.07 | 0.04 | 0    | 0.06 | 0  |
| 7  | 0    | 0.09 | 0.13 | 0.01 | 0.15 | 0    | 0    | 0    | 0.04 | 0    | 0.15 | 0    | 0.12 | 0    | 0.16 | 0  |
| 8  | 0    | 0.06 | 0.09 | 0    | 0.11 | 0    | 0.05 | 0    | 0    | 0.04 | 0    | 0    | 0.09 | 0    | 0.07 | 0  |
| 9  | 0.42 | 0    | 0    | 0.25 | 1.39 | 0.92 | 0.36 | 0.29 | 0    | 0    | 0.62 | 0.41 | 0.79 | 0    | 0.99 | 0  |
| 10 | 0.15 | 0    | 0    | 0.06 | 0.15 | 0    | 0.07 | 0    | 0.10 | 0.06 | 0.30 | 0.16 | 0.34 | 0.40 | 0.29 | 0  |
| 11 | 0    | 0    | 0    | 0    | 0.16 | 0    | 0    | 0    | 0    | 0    | 0    | 0    | 0    | 0    | 0.25 | 0  |
| 12 | 0    | 0.02 | 0.01 | 0.01 | 0    | 0    | 0    | 0    | 0    | 0    | 0    | 0    | 0    | 0    | 0.05 | 0  |
| 13 | 0    | 0    | 0    | 0    | 0    | 0    | 0    | 0    | 0    | 0    | 0    | 0    | 0    | 0    | 0.40 | 0  |
| 14 | 0    | 0    | 0    | 0    | 0.25 | 0    | 0    | 0.13 | 0    | 0    | 0    | 0    | 0    | 0.28 | 0.36 | 0  |
| 15 | 0    | 0    | 0    | 0    | 1.42 | 0    | 0    | 0    | 0    | 0    | 0    | 0    | 0    | 0    | 0.98 | 0  |
| 16 | 0    | 0    | 0    | 0    | 0    | 0    | 0    | 0    | 0    | 0    | 0    | 0    | 0    | 0    | 0.11 | 0  |
| 17 | 0    | 0    | 0    | 0.02 | 0    | 0    | 0    | 0.02 | 0    | 0    | 0    | 0    | 0    | 0    | 0.04 | 0  |
| 18 | 0    | 0    | 0    | 0    | 0    | 0    | 0    | 0    | 0    | 0    | 0    | 0    | 0    | 0    | 0.13 | 0  |
| 19 | 0.16 | 0    | 0    | 0    | 0.11 | 0.06 | 0    | 0    | 0    | 0    | 0    | 0    | 0    | 0    | 0.16 | 0  |
| 20 | 0    | 0    | 0    | 0    | 0    | 0    | 0    | 0    | 0    | 0    | 0.11 | 0.11 | 0    | 0.16 | 0.15 | 0  |
| 21 | 0    | 0    | 0    | 0    | 0    | 0    | 0    | 0    | 0    | 0    | 0    | 0    | 0    | 0    | 0.09 | 0  |
| 22 | 0    | 0    | 0    | 0.02 | 0    | 0    | 0    | 0    | 0    | 0    | 0.22 | 0    | 0.11 | 0    | 0.19 | 0  |
| 23 | 0    | 0    | 0    | 0    | 0    | 0    | 0    | 0.12 | 0    | 0    | 0    | 0.02 | 0    | 0    | 0.12 | 0  |
| 24 | 0    | 0    | 0    | 0    | 0    | 0    | 0    | 0.02 | 0    | 0    | 0.01 | 0    | 0    | 0    | 0.02 | 0  |
| 25 | 0    | 0    | 0    | 0    | 0    | 0    | 0    | 0    | 0    | 0    | 0.19 | 0    | 0    | 0    | 0.16 | 0  |
| 26 | 0.27 | 0    | 0    | 0    | 0.59 | 0    | 0    | 0    | 0    | 0    | 0    | 0    | 0    | 0    | 0.57 | 0  |
| 27 | 0    | 0    | 0    | 0    | 0.46 | 0.25 | 0    | 0    | 1.31 | 0    | 0    | 0    | 0    | 0    | 1.08 | 0  |
| 28 | 0    | 0    | 0    | 0    | 0.10 | 0.07 | 0    | 0    | 0.33 | 0    | 0    | 0    | 0    | 0    | 0.29 | 0  |
| 29 | 0    | 0    | 0    | 0.10 | 0    | 0    | 0    | 0.07 | 0    | 0    | 0    | 0    | 0    | 0    | 0.30 | 0  |
| 30 | 0.18 | 0    | 0    | 0    | 0    | 0    | 0    | 0    | 0    | 0    | 0    | 0    | 0    | 0    | 0.39 | 0  |
| 31 | 0    | 0    | 0    | 0.06 | 0    | 0    | 0.10 | 0    | 0    | 0    | 0    | 0.16 | 0.15 | 0    | 0.31 | 0  |
| 32 | 0    | 0    | 0    | 0.06 | 0.13 | 0.07 | 0    | 0    | 0    | 0    | 0    | 0    | 0    | 0    | 0.18 | 0  |
| 33 | 0    | 0    | 5.00 | 0    | 0    | 0    | 0    | 0    | 2.08 | 0    | 2.39 | 0    | 0    | 0    | 3.36 | 0  |
| 34 | 0    | 0.52 | 0.53 | 0    | 0    | 0    | 0    | 0    | 0    | 0    | 0    | 0    | 0    | 0    | 0.48 | 0  |
| 35 | 0.30 | 0    | 0    | 0    | 0.53 | 0.33 | 0    | 0.33 | 0    | 0    | 0.94 | 0    | 0    | 0    | 1.15 | 0  |
| 36 | 0.11 | 0    | 0    | 0    | 0.63 | 0    | 0    | 0    | 0    | 0    | 0    | 0    | 0    | 0    | 0.24 | 0  |
| 37 | 0    | 0.06 | 0.09 | 0    | 0    | 0    | 0    | 0    | 0    | 0    | 0    | 0    | 0    | 0.04 | 0.07 | 0  |
| 38 | 0.74 | 0    | 0    | 0    | 0.31 | 0.27 | 0    | 0    | 0    | 0    | 0    | 0    | 0    | 0    | 0.64 | 0  |
| 39 | 0.13 | 0    | 0    | 0    | 0.15 | 0.11 | 0.06 | 0.05 | 0    | 0    | 0    | 0.07 | 0    | 0    | 0.16 | 0  |
| 40 | 0    | 0.22 | 0.25 | 0    | 0    | 0    | 0    | 0    | 0    | 0    | 0    | 0    | 0    | 0    | 0.23 | 0  |
| 41 | 0.36 | 0    | 0    | 0    | 0.68 | 0    | 0    | 0    | 0    | 0    | 0    | 0    | 0    | 0.59 | 0.98 | 0  |

|    |      |      |      |      |      |      |      |      |      |      |      |      |      |      |      |   |
|----|------|------|------|------|------|------|------|------|------|------|------|------|------|------|------|---|
| 42 | 0    | 0    | 0    | 0.09 | 0    | 0    | 0    | 0    | 0    | 0.25 | 0    | 0    | 0    | 0    | 0.21 | 0 |
| 43 | 0    | 0.31 | 0.53 | 0    | 0    | 0    | 0    | 0    | 0    | 0    | 0.44 | 0    | 0    | 0    | 0.33 | 0 |
| 44 | 0    | 0.05 | 0.10 | 0    | 0    | 0    | 0    | 0    | 0    | 0    | 0    | 0    | 0    | 0    | 0.05 | 0 |
| 45 | 0    | 0    | 0    | 0    | 0    | 0    | 0    | 0    | 0    | 0    | 0    | 0.05 | 0    | 0    | 0.12 | 0 |
| 46 | 0    | 0    | 0    | 0.02 | 0    | 0    | 0    | 0    | 0    | 0    | 0    | 0    | 0    | 0    | 0.02 | 0 |
| 47 | 0    | 0    | 0    | 0    | 0.36 | 0    | 0    | 0    | 0    | 0    | 0.64 | 0    | 0    | 0.45 | 0.53 | 0 |
| 48 | 0.46 | 1.63 | 1.60 | 0.30 | 0.94 | 0.61 | 0    | 0.27 | 0    | 0    | 0.97 | 0.28 | 0.61 | 1.44 | 1.21 | 0 |
| 49 | 0    | 0.29 | 0.44 | 0    | 0    | 0    | 0    | 0    | 0.09 | 0    | 0.42 | 0    | 0    | 0    | 0.35 | 0 |
| 50 | 0.18 | 0.31 | 0.51 | 0.09 | 0.51 | 0.28 | 0    | 0.16 | 0    | 0    | 0    | 0    | 0.41 | 0.30 | 0.42 | 0 |
| 51 | 0    | 0.13 | 0.17 | 0    | 0    | 0    | 0.19 | 0    | 0    | 0    | 0    | 0    | 0    | 0    | 0.15 | 0 |
| 52 | 0    | 0    | 0    | 0    | 0    | 0    | 0    | 0    | 0.13 | 0    | 0    | 0    | 0    | 0.22 | 0.22 | 0 |
| 53 | 0    | 0    | 0    | 0    | 0    | 0    | 0    | 0    | 0    | 0    | 0.30 | 0    | 0    | 0    | 0.30 | 0 |
| 54 | 0    | 0    | 0    | 0.02 | 0    | 0    | 0    | 0.05 | 0    | 0    | 0    | 0    | 0    | 0    | 0.05 | 0 |
| 55 | 0.90 | 2.62 | 3.74 | 0.36 | 1.96 | 1.06 | 0.46 | 0.63 | 1.87 | 0    | 2.60 | 0.83 | 1.33 | 2.06 | 3.57 | 0 |

72

73

#### 74 **References (SI)**

75

76 ECB. Technical Guidance Document on Risk Assessment: European Chemicals Bureau; 2003

77

78
